# Supplementary material for: Chemical Composition and Antifungal In Vitro and In Silico, Antioxidant, and Anticholinesterase Activities of Extracts and Constituents of Ouratea fieldingiana (DC.) Baill
Source: Hindawi journal article supplement (doi:10.1155/2018/1748487), 2018-01-01
Supplement: f1 [file 1748487.f1.pdf]

# Chemical compounds and biological actions of *Ouratea fieldingiana* (DC.) Baill

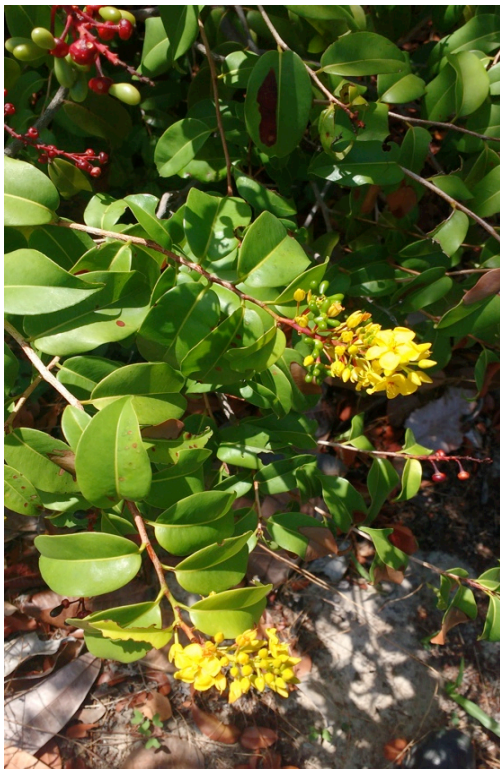

*Ouratea fieldingiana*

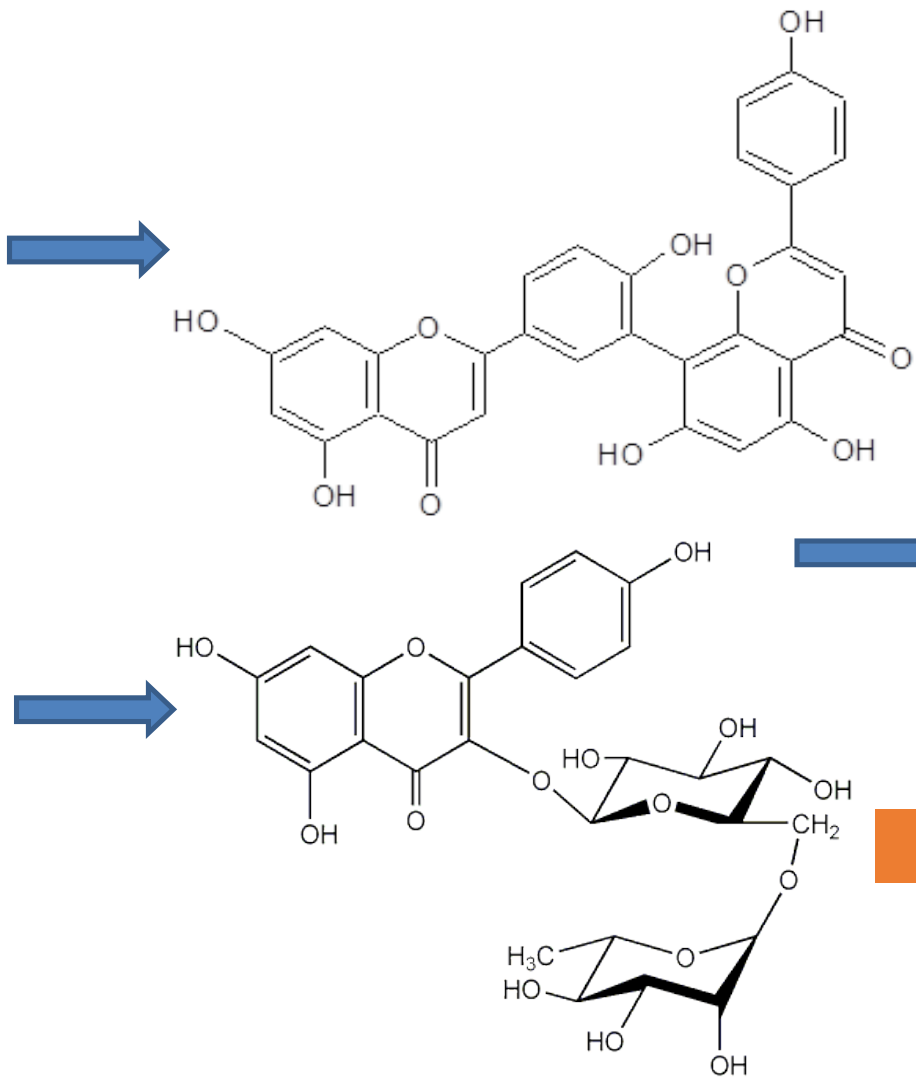

Amentoflavone

- Activities:
- Wound healing
  - Antifungal
  - Inhibition of AChE
  - Antioxidant

Kaempferol 3-O-rutinoside
